# Supplementary material for: Micro-battery Development for Juvenile Salmon Acoustic Telemetry System Applications
Source: PubMed Central journal article supplement — Sci Rep. 2014 Jan 21;4:3790. doi: 10.1038/srep03790 (PMC3896900; doi:10.1038/srep03790), 2014-01-21
Supplement: srep03790-s1.pdf [file srep03790-s1.pdf]

## Supporting Information

### Micro-battery Development for Juvenile Salmon

#### Acoustic Telemetry System Applications

Honghao Chen, Samuel Cartmell, Qiang Wang, Terence Lozano, Z. Daniel Deng<sup>\*</sup>,  
Huidong Li, Xilin Chen, Yong Yuan, Mark E. Gross, Thomas J. Carlson, Jie Xiao<sup>\*</sup>  
*Energy and Environment Directorate, Pacific Northwest National Laboratory,  
902 Battelle Blvd, Richland, WA 99352, US*

<sup>\*</sup>Corresponding authors: E-mail: [jie.xiao@pnnl.gov](mailto:jie.xiao@pnnl.gov); [zhiqun.deng@pnnl.gov](mailto:zhiqun.deng@pnnl.gov), Tel.:1-509-375-4598, Fax: 1-509-375-2186.

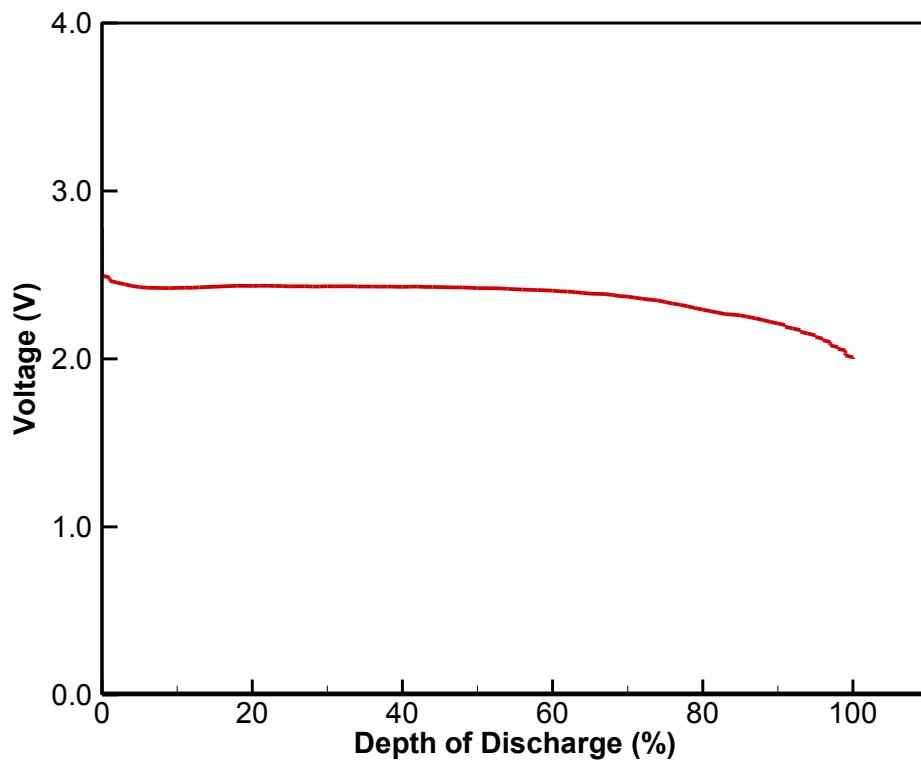

**Figure S1.** Voltage variation at different depth of discharge of MB306 battery at 0.1C (1C = 864mA/g ) current rate (~1 mA). The flat voltage plateau is necessary to steadily drive the circuit board in the transmitter.

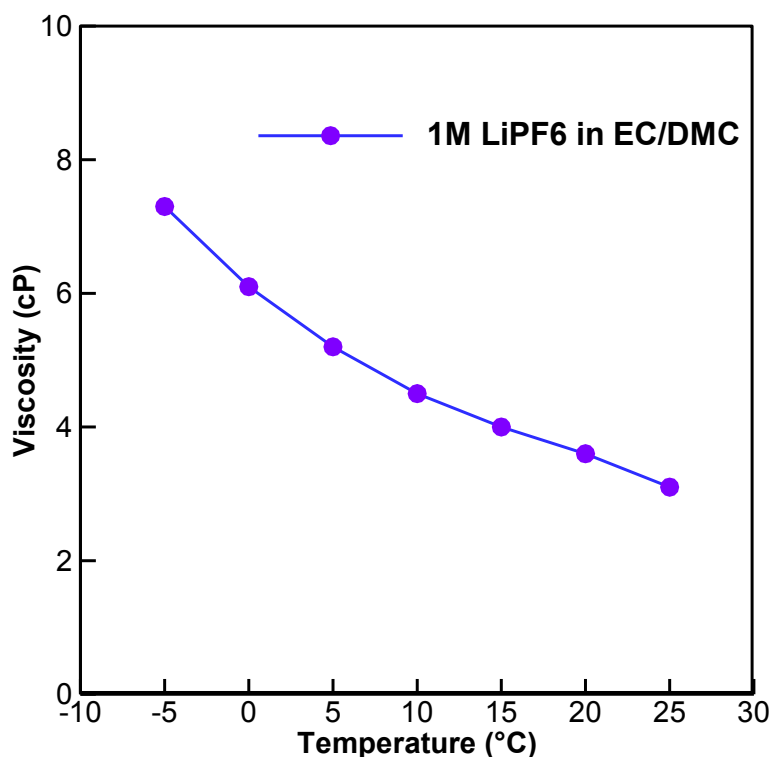

**Figure S2.** Measured viscosity of electrolyte (1M LiPF<sub>6</sub> in EC/DMC, volume ratio 1:1) at temperatures ranging from -5°C to 25°C.

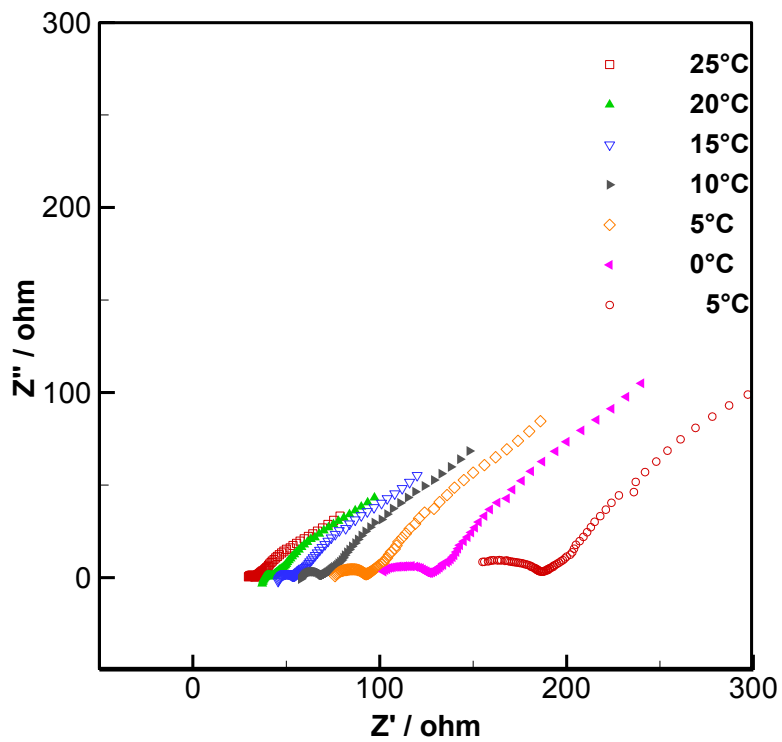

**Figure S3.** Comparison of the Nyquist impedance spectra of the SR416 cells at temperatures from  $-5^{\circ}\text{C}$  to  $25^{\circ}\text{C}$

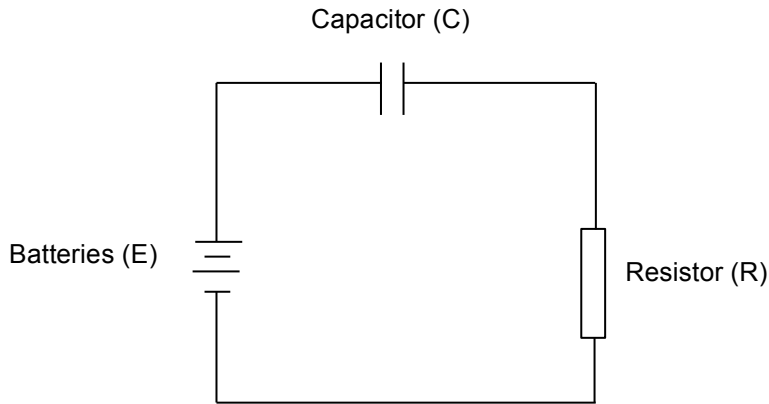

**Figure S4.** The transmitter can be simplified into a circuit consisting of a power supply (i.e., MB306 or SR416), a capacitor, and a resistor, connected in serial. The charging current of a capacitor is

$$I = \frac{V_b}{R} e^{-\frac{t}{RC}}$$

where  $V_b$  is the voltage applied on the external circuit,  $R$  is the resistor in the external circuit, and  $C$  is the capacity of the capacitor.

If we take the internal resistance of the battery ( $R_s$ ) into consideration, the equation can be re-written as

$$I = \frac{E}{R + R_s} e^{-\frac{t}{(R+R_s)C}}$$

where  $E$  is the open circuit voltage of the battery. Thus, the maximum charge current of the transmitter is  $I_{max} = \frac{E}{R+R_s}$ . As shown in Fig. 4, the  $R_s$  of SR416 increased from 29  $\Omega$  at 25°C to 155  $\Omega$  at 0°C, which resulted in the significant maximum charge current decrease as shown in Fig. 5b. Because the  $R_s$  of the MB306 cell changed little with the temperature, the reduced charge peak current was negligible.
